# Supplementary material
Source: PubMed Central journal article supplement (PMC2614745)
Supplement: 0805344105_0805344105SI.pdf [file 0805344105_0805344105SI.pdf]

# Supporting Information

Ma'ayan *et al.* 10.1073/pnas.0805344105

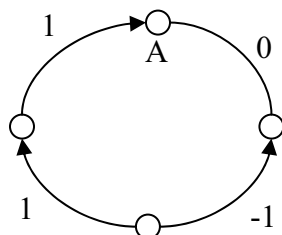

Fig. S1. Example of a 4-node-cycle with directed and undirected links.

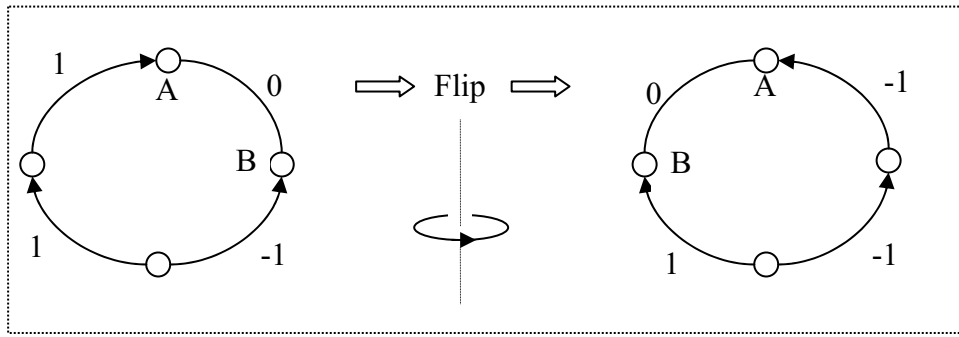

Fig. S2. A flip of the 4-node cycle of Fig. 1 consists of turning the cycle over, while inverting the edge directions.

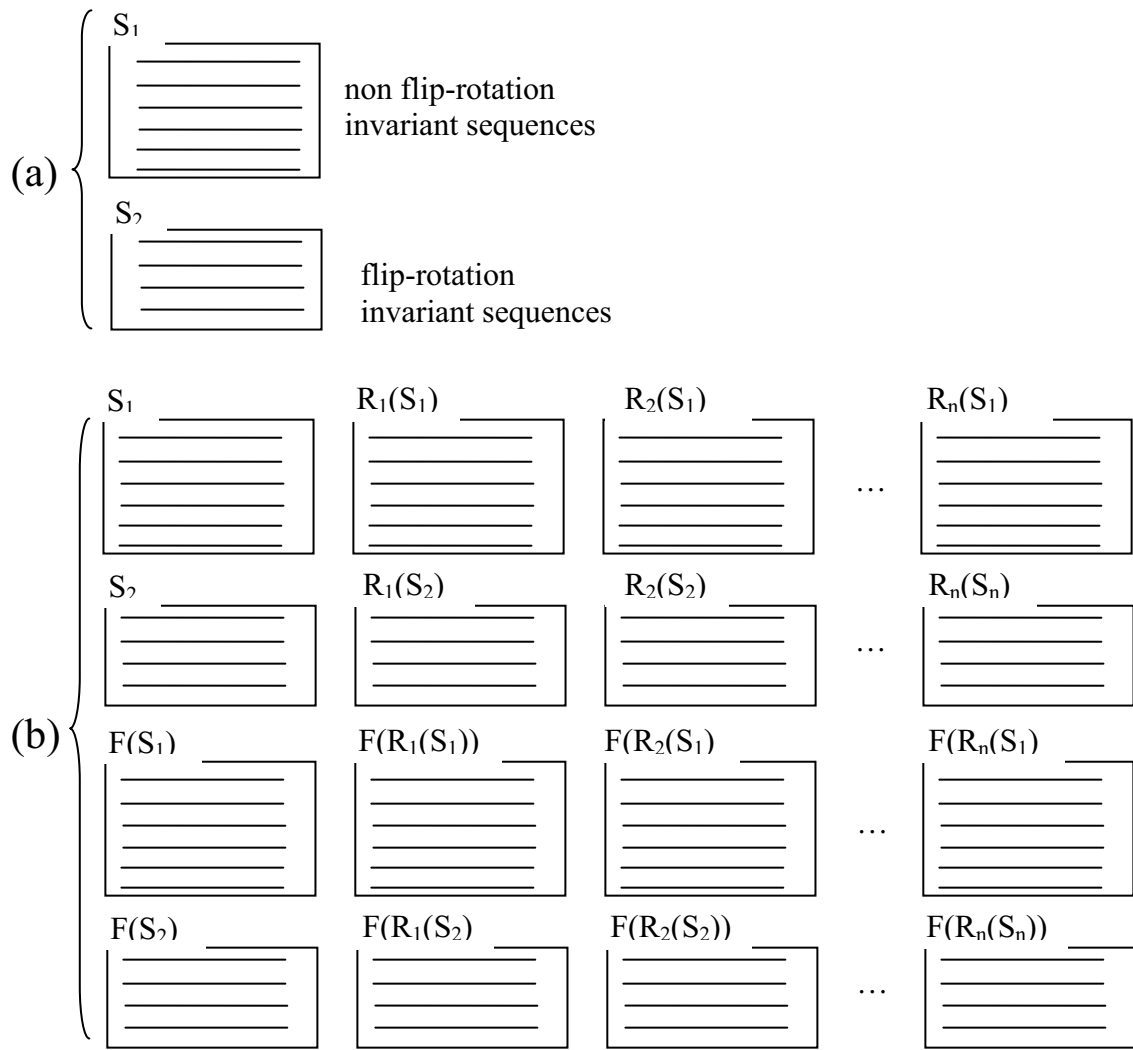

**Fig. S3.** Construction to count the number of unique directed cycles. (a) Assuming we know what those  $N_n$  cycles are, we divide them into the set  $S_1$  of non-rotation-flip invariant and  $S_2$  of rotation-flip invariant cycles. (b) For each sequence, we create all possible rotations, and flips, leading to a total of  $2nN_n$  cycles.

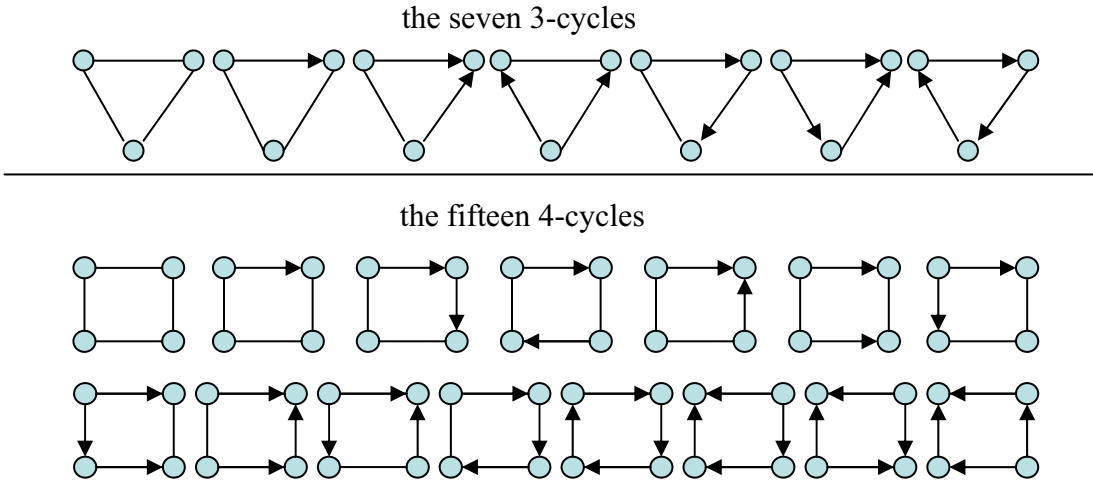

Fig. S4. The complete non-isomorphic list of 3- and 4-node-cycles.

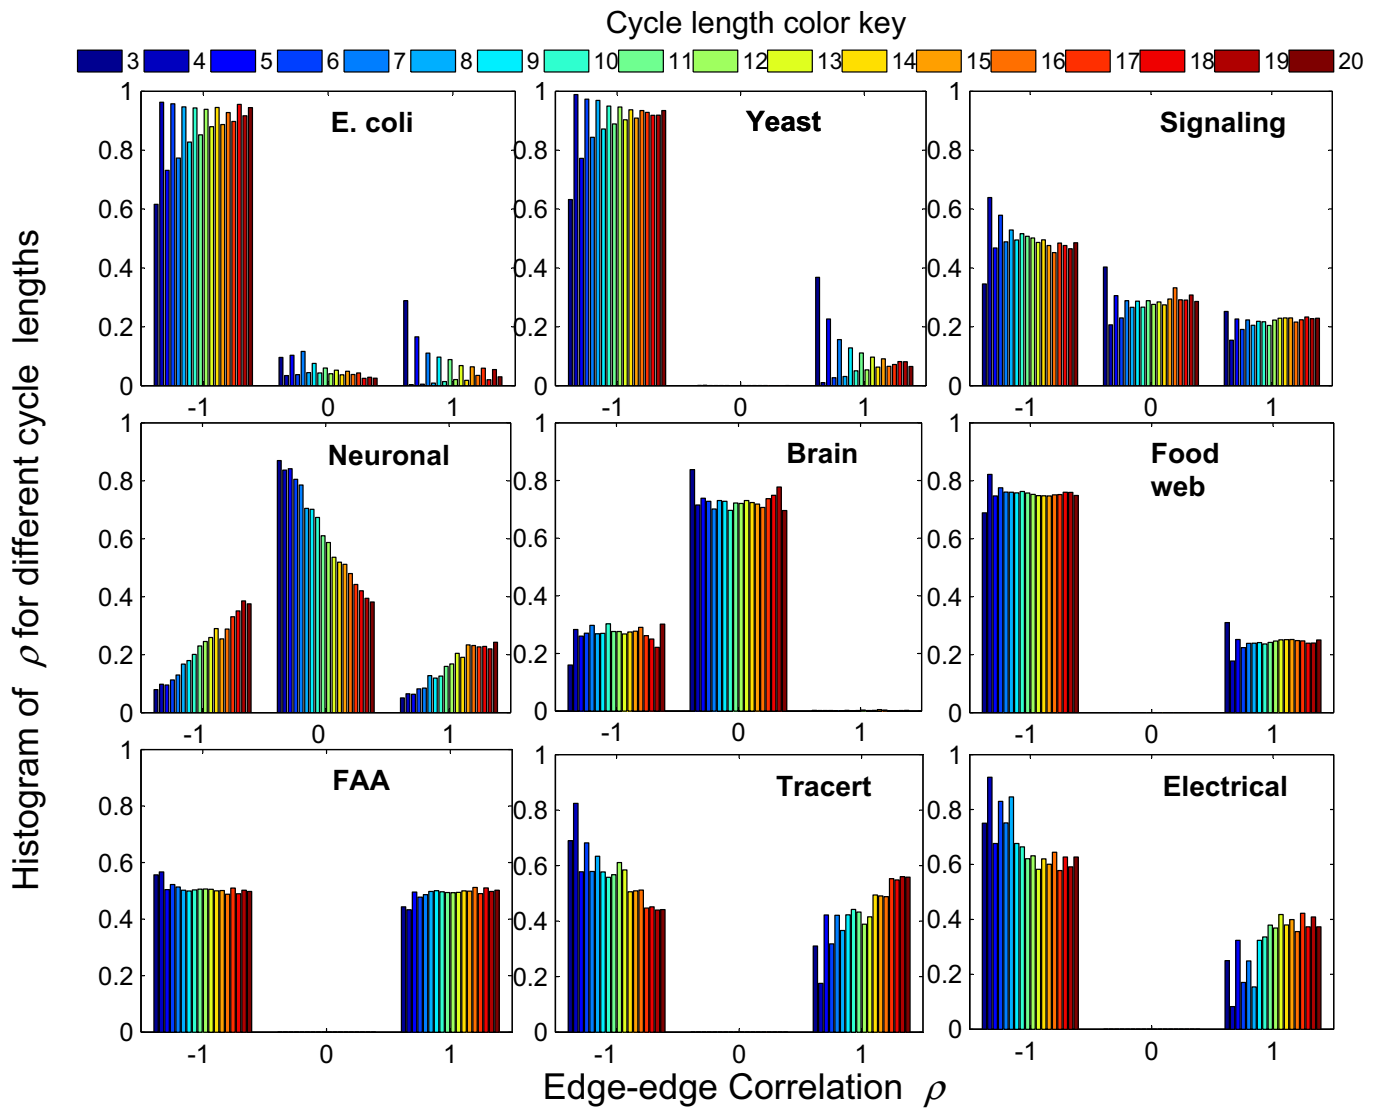

**Fig. S5.** Normalized histograms of the edge-edge correlation for the nine networks studied.  $\rho = -1, 0,$  and  $1$  correspond source/sink nodes, nodes with at least one neutral edge, and pass-through nodes. Each color corresponds to one cycle length, as indicated in the color key.

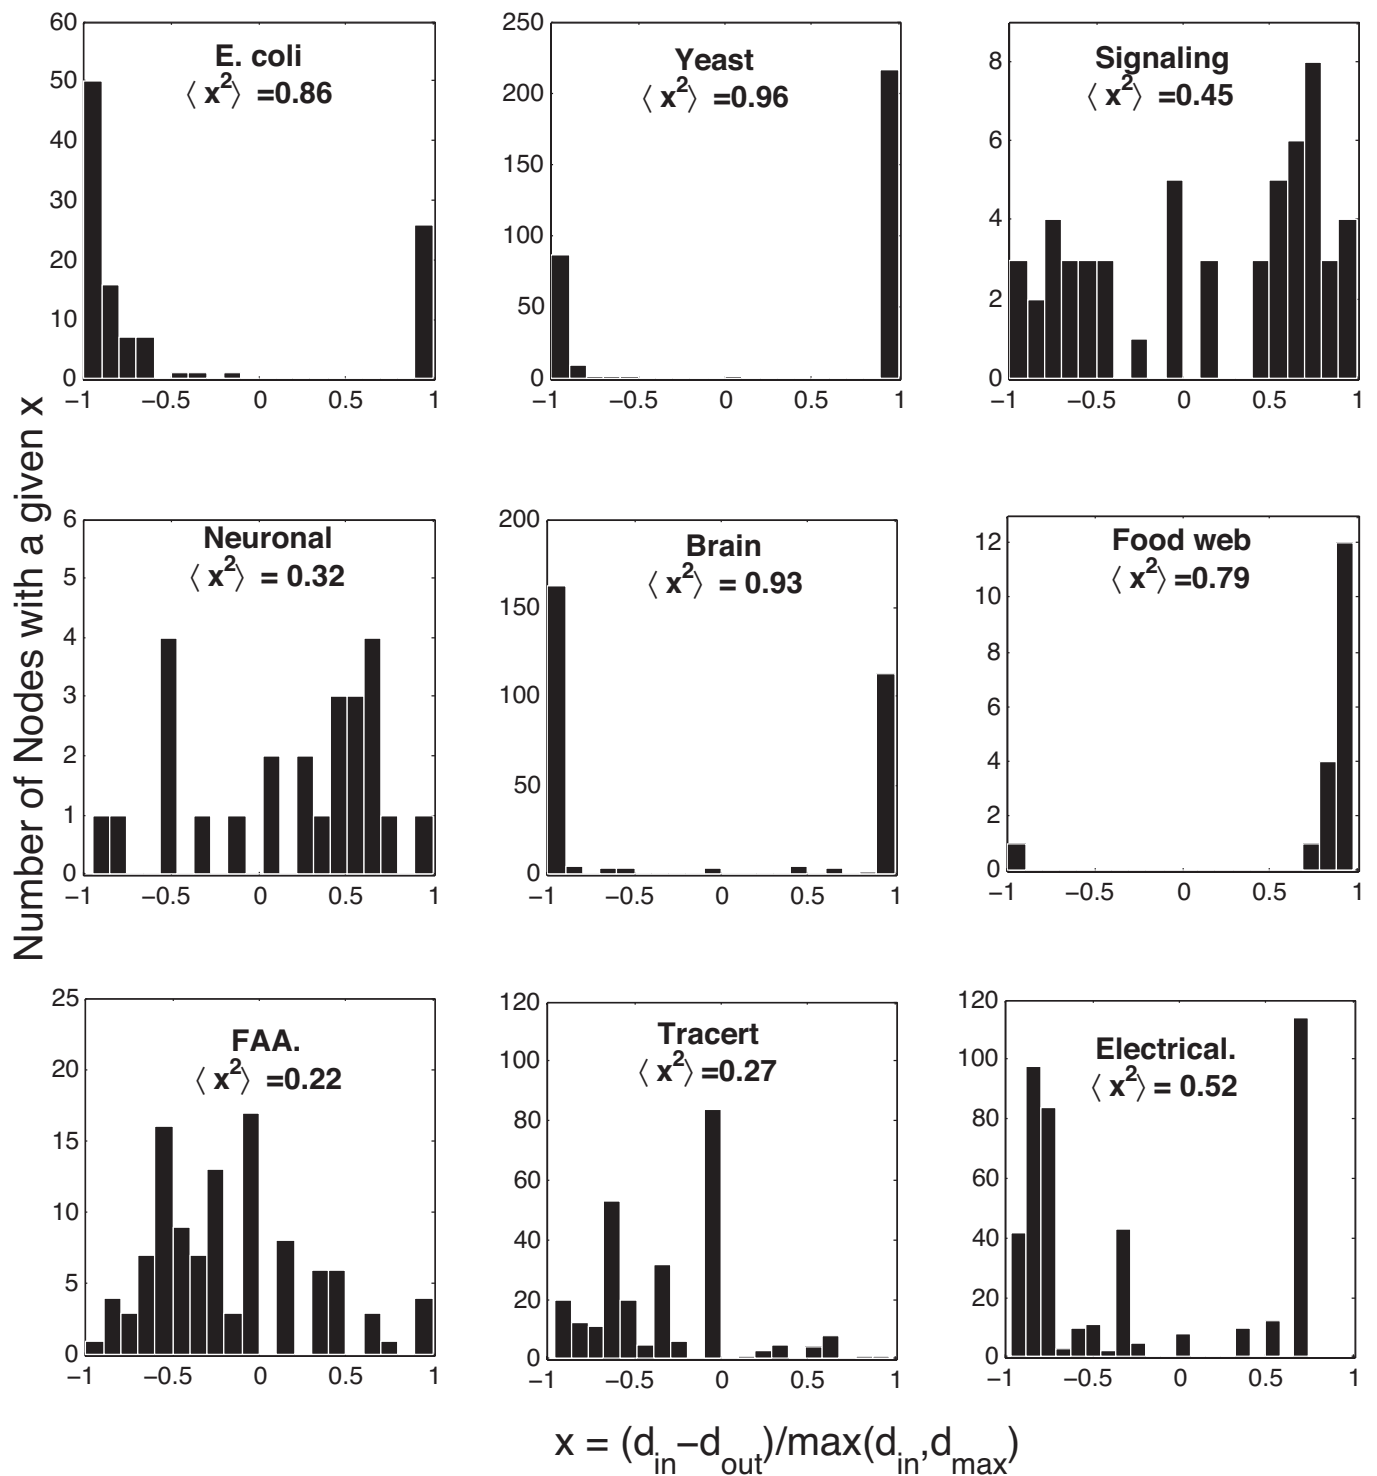

**Fig. S6.** The exclusion principle. If the postulated exclusion principle is operational, there would be a large number of nodes with exclusion principle measure close to  $x = 1$  and/or  $x = -1$ . The figure shows that this is the case for some, but not all of the networks. The data correspond to nodes in the 10 upper percentile of the directed edge distribution (i.e., excluding neutral links).

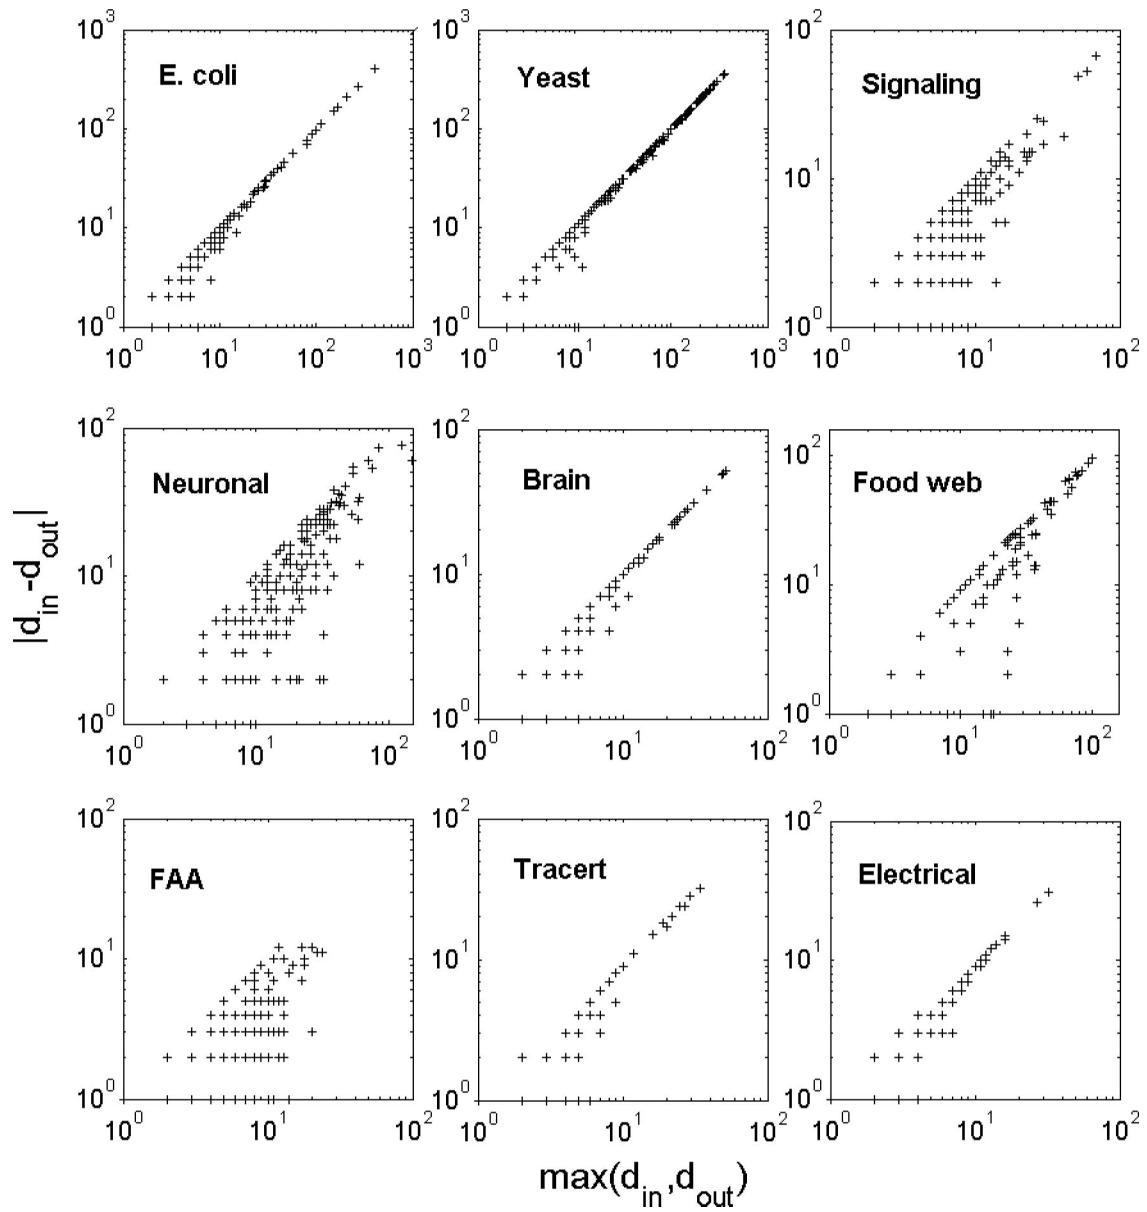

**Fig. S7.** A second view of the “exclusion principle”. The horizontal axis is the maximum between the in- and out-degrees, and the vertical axis is the absolute value of the difference between the degrees, for each node. Each subpanel depicts the analysis for a different network.

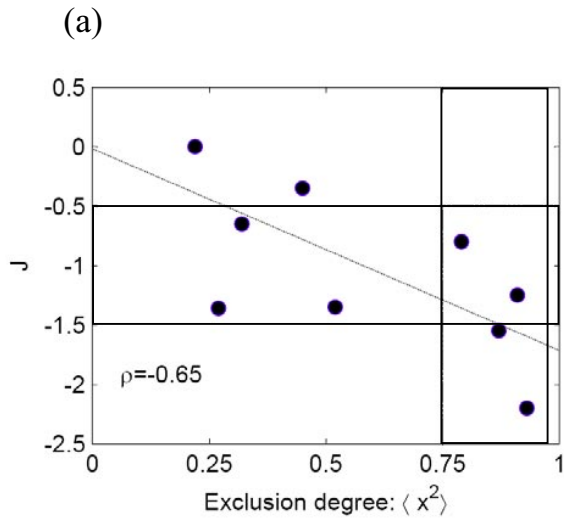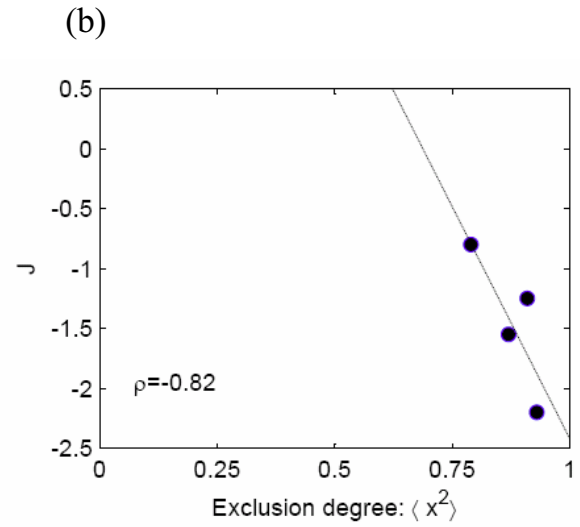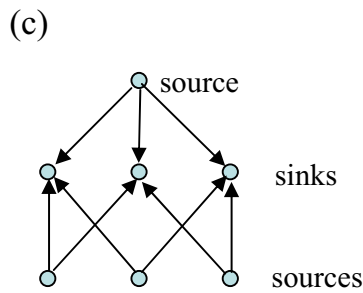

$$\langle x^2 \rangle = 1, \langle |M_4| \rangle = 0; \langle |M_6| \rangle = 0;$$

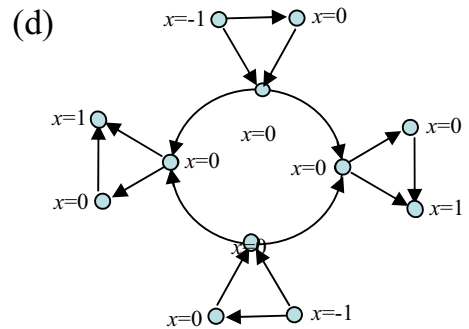

$$\langle x^2 \rangle = 0.33; \langle |M_3| \rangle = 1; \langle |M_4| \rangle = 0$$

**Fig. S8.** The “exclusion principle” and antiferromagnetism. (a) there is a substantial correlation ( $r = -0.74$ ) between the magnetic coupling  $J$  and the exclusion degree  $\langle x^2 \rangle$ . (b) The correlation is stronger ( $r = -0.82$ ) in the region  $\langle x^2 \rangle \gg 0.65$ . The horizontal rectangle (a) contains points with antiferromagnetic  $J$  but weak exclusion degree. (c) Example where the exclusion principle leads to antiferromagnetism. (d) Examples where antiferromagnetism does not lead to exclusion principle.





| ecoli | z-score | brain | z      | signaling | z      | electr. | z       | yeast | z       | faa   | z      | foodweb | z      | neuron | z       |
|-------|---------|-------|--------|-----------|--------|---------|---------|-------|---------|-------|--------|---------|--------|--------|---------|
| 2252  | 28.049  | 990   | 5401.2 | 13214     | 43.571 | 204     | 876.02  | 206   | 50.093  | 2126  | 48.336 | 3038    | 145.54 | 46     | 6.626   |
| 718   | 26.534  | 9182  | 2811.2 | 13278     | 34.892 | 202     | 243.98  | 204   | 42.299  | 4958  | 47.371 | 2766    | 136.37 | 36     | 5.0978  |
| 462   | 18.228  | 734   | 2140.4 | 204       | 34.209 | 2182    | 229.4   | 2126  | 21.17   | 206   | 45.938 | 2182    | 122.12 | 238    | 5.0693  |
| 8910  | 15.696  | 17238 | 1682.5 | 990       | 27.25  | 2124    | 203.31  | 14    | 11.156  | 670   | 36.082 | 27342   | 97.678 | 78     | -5.0512 |
| 398   | 14.439  | 862   | 946.3  | 17238     | 24.019 | 2076    | 163.93  | 2118  | 7.9355  | 2190  | 32.346 | 31710   | 95.794 | 14     | -6.885  |
| 204   | 14.117  | 2462  | 943.93 | 17246     | 20.381 | 2118    | 130.62  | 2190  | 7.3285  | 2252  | 32.202 | 2270    | 93.899 |        |         |
| 2188  | 13.155  | 4574  | 828.94 | 862       | 17.371 | 142     | 23.264  | 202   | 4.8908  | 734   | 31.987 | 18460   | 80.756 |        |         |
| 2190  | 12.085  | 222   | 790.65 | 18636     | 14.858 | 392     | 5.0984  | 2252  | 4.4285  | 718   | 31.863 | 222     | 72.884 |        |         |
| 206   | 11.377  | 4958  | 757.38 | 8732      | 14.816 | 652     | 3.0847  | 2076  | 4.2823  | 2140  | 31.809 | 18518   | 56.283 |        |         |
| 710   | 11.246  | 18846 | 687.12 | 27340     | 14.267 | 2184    | 2.8858  | 2182  | 3.9872  | 204   | 30.923 | 2758    | 45.502 |        |         |
| 142   | 8.8148  | 350   | 484.33 | 2758      | 13.687 | 140     | 2.7168  | 142   | 3.9388  | 462   | 29.094 | 2076    | 44.06  |        |         |
| 604   | 8.3374  | 2782  | 426.3  | 4554      | 13.547 | 14      | 0.282   | 2188  | 3.4112  | 8606  | 28.048 | 14      | 42.735 |        |         |
| 8908  | 7.2057  | 6558  | 258.3  | 19142     | 12.983 | 2188    | 0.0142  | 652   | 3.0151  | 142   | 27.783 | 2140    | 41.684 |        |         |
| 334   | 5.9381  | 4510  | 251.41 | 350       | 12.009 | 536     | -0.304  | 716   | 2.1566  | 2076  | 26.058 | 2252    | 34.054 |        |         |
| 4494  | 4.9519  | 18518 | 224.41 | 16982     | 11.764 | 28      | -7.1227 | 30    | 2.1329  | 5070  | 25.163 | 2202    | 25.812 |        |         |
| 6302  | 4.3243  | 666   | 173.19 | 19148     | 11.744 | 74      | -13.429 | 2124  | 1.1045  | 17302 | 24.787 | 392     | 25.448 |        |         |
| 2124  | 4.2256  | 158   | 166.78 | 2182      | 11.185 | 2116    | -19.372 | 2184  | 0.93481 | 4554  | 21.459 | 2254    | 24.345 |        |         |
| 4574  | 4.0701  | 27030 | 134.87 | 14        | 10.592 |         |         | 590   | 0.84391 | 18634 | 21.343 | 18636   | 20.159 |        |         |
| 716   | 4.0355  | 8908  | 121.45 | 9182      | 10.163 |         |         | 710   | 0.26384 | 2142  | 21.201 | 2184    | 18.633 |        |         |
| 30    | 3.938   | 2398  | 106.48 | 19150     | 10.14  |         |         | 714   | 0.23853 | 2758  | 21.132 | 206     | 17.598 |        |         |
| 14    | 3.4422  | 2458  | 106.29 | 8650      | 9.8458 |         |         | 536   | 0.1699  | 10398 | 21.018 | 204     | 16.739 |        |         |

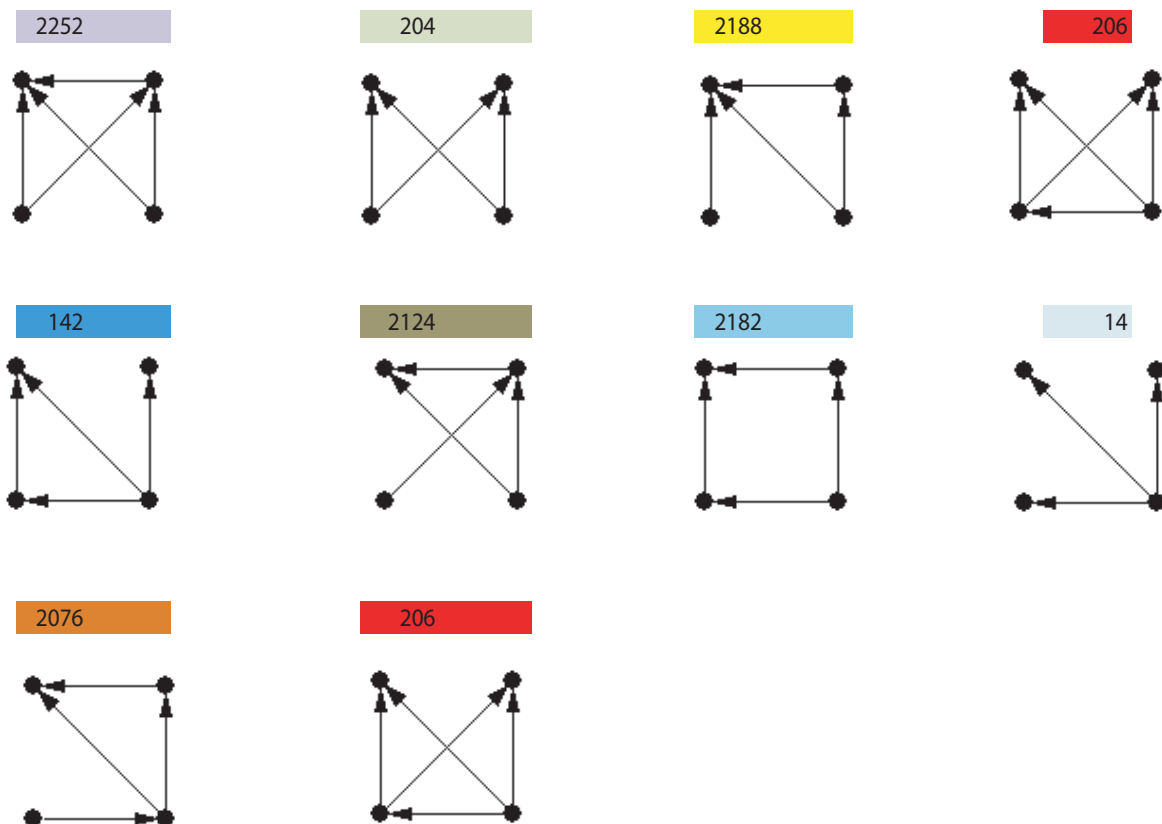

**Fig. S10.** Four-node network motifs identified using FANMOD. Motifs are listed for each network based on the  $P$  value of their significance. The motifs that are found in more than three networks are highlighted in different colors where the configuration is drawn below. The bifan motif has the motif ID 204. Note that bifans are also embedded in motifs 2252, and 206.





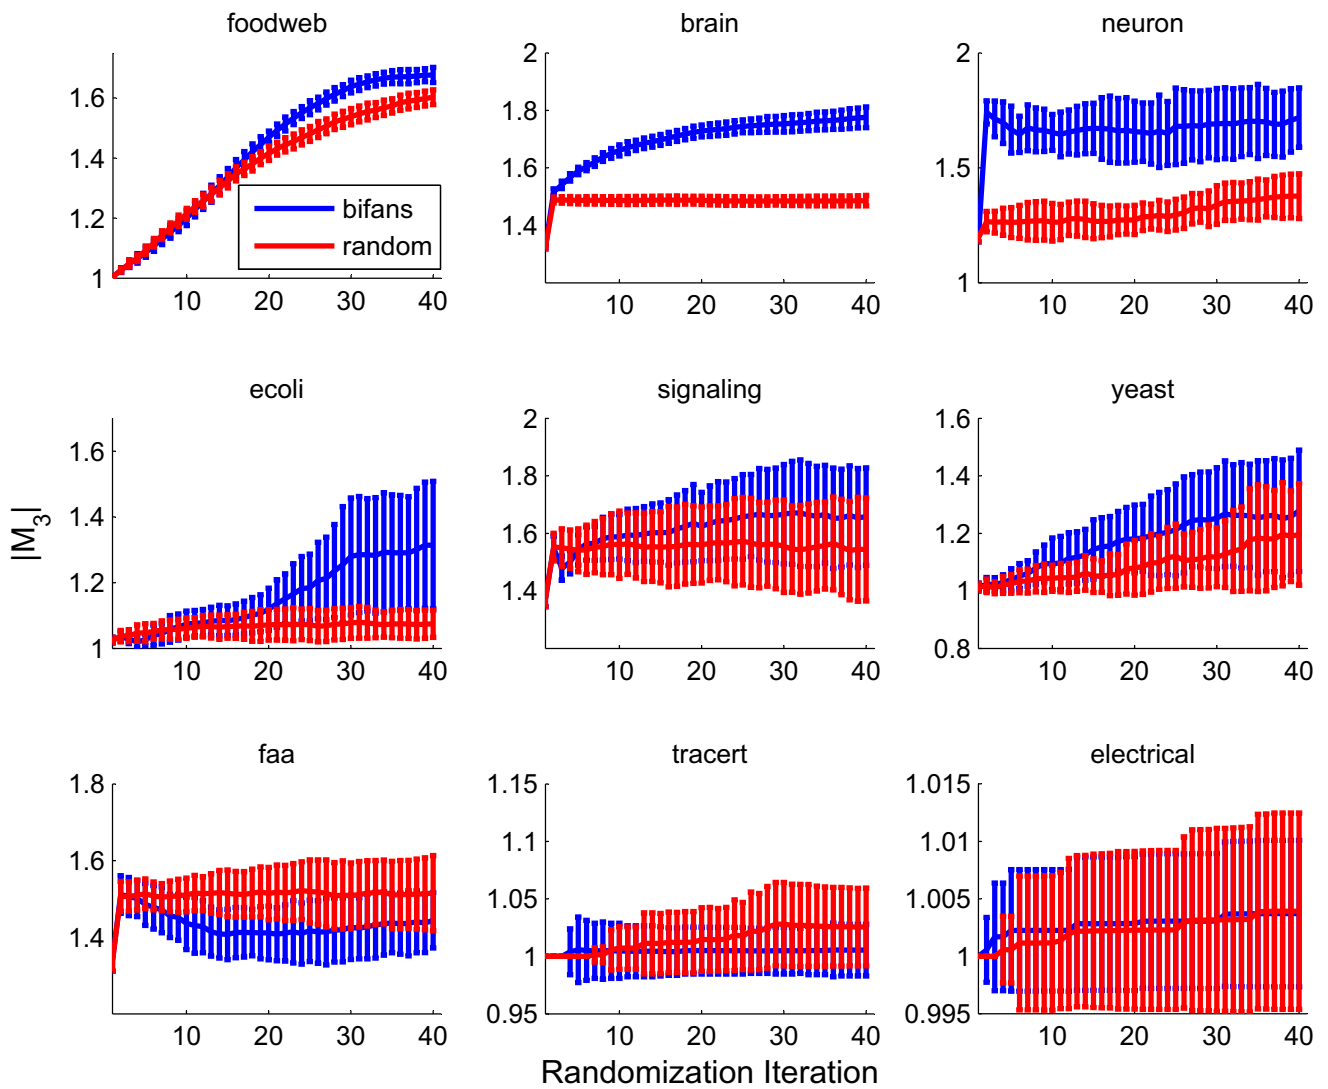

**Fig. S13.** Effect of bifan removal ( $n = 3$ ). Surrogate networks generated by randomizing the links corresponding to the top out- and in-bifan hubs (blue trace), and by randomizing the same number of links chosen from random nodes (red trace). The effect is similar to what is observed for the degree hub removal, although the tracet and electrical networks do not show a significant trend for this cycle size.



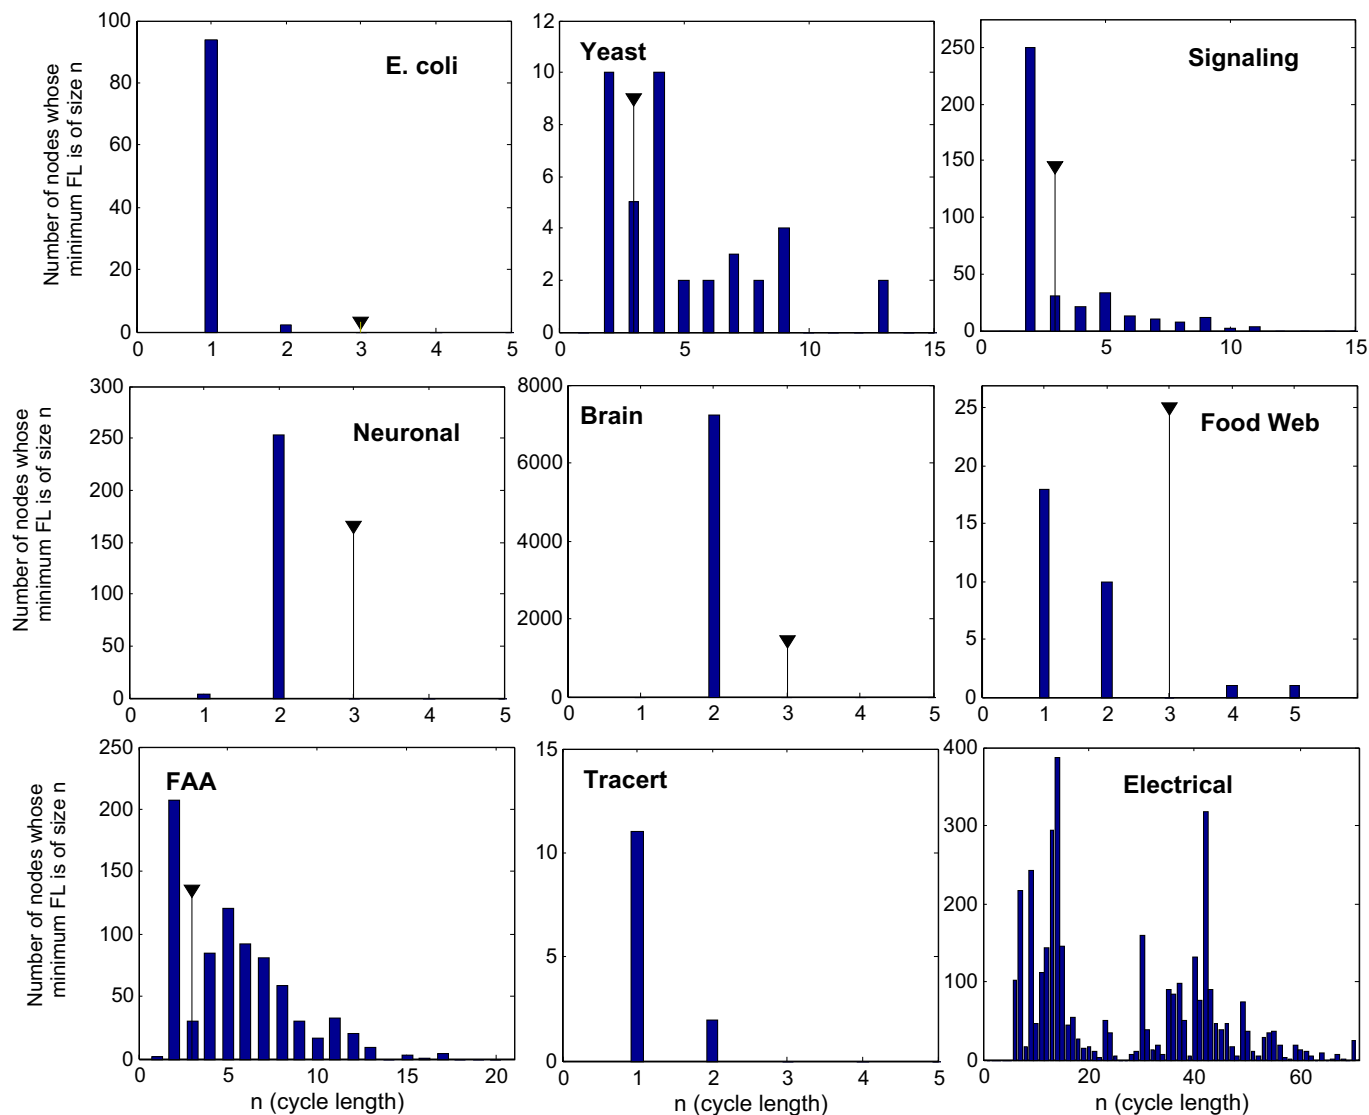

**Fig. S15.** Distribution of nodes that participate in at least one feedback loop, and whose minimum FL is of a given size. The plots show the number of nodes whose minimum feedback loop is of size  $n$ , for  $n = 1, 2, \dots$ . The number of nodes with loops of length greater than 2 is underestimated. For example, the triangle-topped stem in each subfigure shows the actual number of nodes affected by feedback loops of size 3. The blue bars at  $n = 3$  are shorter because some of the nodes participating in 3-loops were counted as participating in 2-loops and 1-loops.





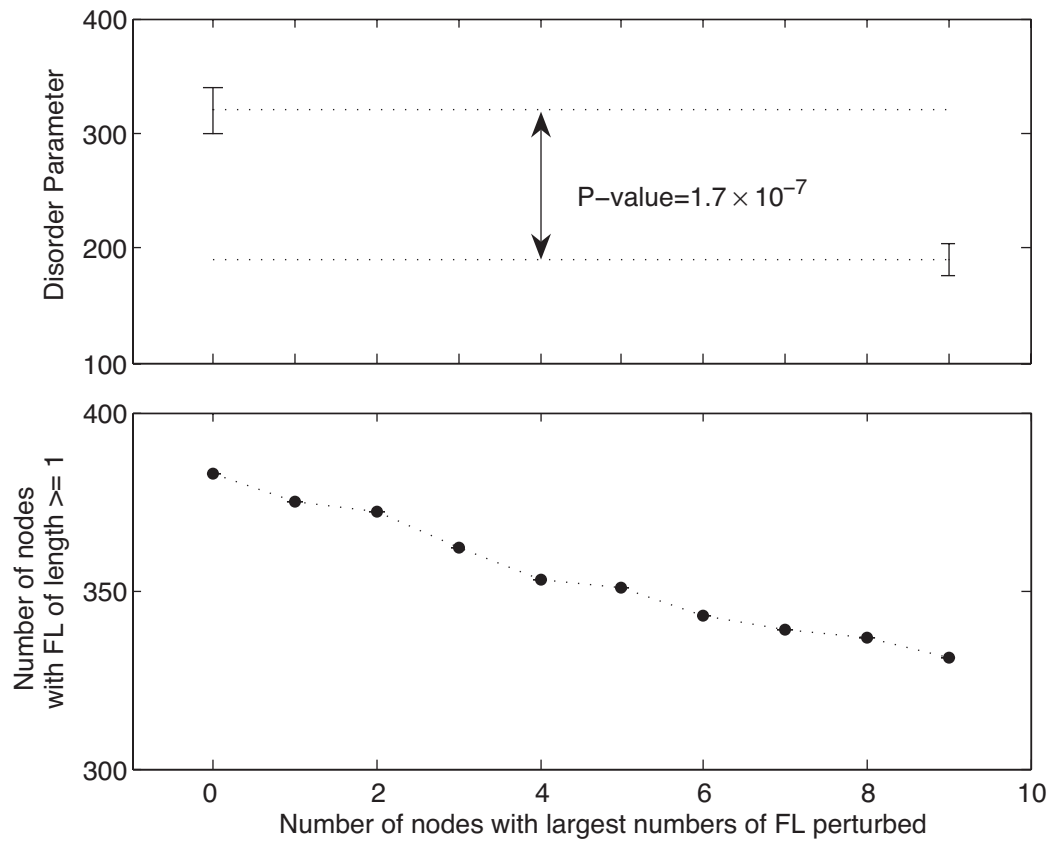

**Fig. S17.** The effects of node removal on the disorder parameter for the signaling network. We removed feedback loops by excising the links associated with the nodes affected with the most number of feedback loops (including 1-loops and 2-loops). We iterated this process for a total of 9 node removals. At the 0th removal and the 9th removal, we computed the disorder parameter. The network with fewer feedback loops had a significantly smaller disorder parameter.

Table S1. The rotation-flip invariant constraints for  $k = 3$  and  $n = 7$  for sequence  $s = s_1 s_2 s_3 s_4 s_5 s_6 s_7$

$$\begin{aligned} R_3(s) &= F(s) \\ \hline s_4 &= \underline{s_7} \\ s_5 &= \underline{s_6} \\ s_6 &= \underline{s_5} \\ s_7 &= \underline{s_4} \\ s_1 &= \underline{s_3} \\ s_2 &= \underline{s_2} \rightarrow s_2 = 0 \\ s_3 &= \underline{s_1} \\ \hline \end{aligned}$$

The underline in  $\underline{s_j}$  denotes  $-s_j$ .

**Table S2. The rotation-flip invariant constraints for  $n = 6$  and  $k = 3$  and 4, for sequence  $s = s_1 s_2 s_3 s_4 s_5 s_6$**

| $R_3(s) = F(s)$                             | $R_4(s) = F(s)$         |
|---------------------------------------------|-------------------------|
| $s_4 = \underline{s_6}$                     | $s_5 = \underline{s_6}$ |
| $s_5 = \underline{s_5} \rightarrow s_5 = 0$ | $s_6 = \underline{s_5}$ |
| $s_6 = \underline{s_4}$                     | $s_1 = \underline{s_4}$ |
| $s_1 = \underline{s_3}$                     | $s_2 = \underline{s_3}$ |
| $s_2 = \underline{s_2} \rightarrow s_2 = 0$ | $s_3 = \underline{s_2}$ |
| $s_3 = \underline{s_1}$                     | $s_4 = \underline{s_1}$ |

The underline in  $\underline{s_j}$  denotes  $-s_j$ .

Table S3. The rotation-flip invariant constraints for  $k = 2$  and  $n = 4$  for sequence  $s = s_1 s_2 s_3 s_4$

$$R_2(s) = F(s)$$

$$s_3 = \underline{s_4}$$

$$s_4 = \underline{s_3}$$

$$s_1 = \underline{s_2}$$

$$s_2 = \underline{s_1}$$

The underline in  $\underline{s_j}$  denotes  $-s_j$ .

**Table S4. The rotation-flip invariant sequences for  $k = 2$  and  $n = 4$** 

|          | X  | $\bar{X}$ | Y  | $\bar{Y}$ |          | X  | $\bar{X}$ | Y | $\bar{Y}$ |
|----------|----|-----------|----|-----------|----------|----|-----------|---|-----------|
| A        | -1 | 1         | -1 | 1         | D        | 1  | -1        | 0 | 0         |
| B        | 0  | 0         | -1 | 1         | $R_2(C)$ | -1 | 1         | 1 | -1        |
| C        | 1  | -1        | -1 | 1         | $R_2(D)$ | 0  | 0         | 1 | -1        |
| $R_2(B)$ | -1 | 1         | 0  | 0         | $R_1(A)$ | 1  | -1        | 1 | -1        |
| Z        | 0  | 0         | 0  | 0         |          |    |           |   |           |

Except for the all-zero sequence, for each of these sequences there is a different but rotation-equivalent one in the set.

**Table S5. All the sequences of period  $p$  equal to 1, 2, and (a subset of) 4, that have a period that start at the beginning of the sequence and one (possibly the same) that end at location  $j$**

| S  |    |    |    |       | R <sub>1</sub> (s) |    |    |    | R <sub>2</sub> (s) |    |    |    | R <sub>3</sub> (s) |       |    |    |    |    |       |
|----|----|----|----|-------|--------------------|----|----|----|--------------------|----|----|----|--------------------|-------|----|----|----|----|-------|
| 0  | 0  | 0  | 0  | [1,1] | 0                  | 0  | 0  | 0  | [2,2]              | 0  | 0  | 0  | 0                  | [3,1] | 0  | 0  | 0  | 0  | [4,1] |
| -1 | -1 | -1 | -1 | [1,1] | -1                 | -1 | -1 | -1 | [2,2]              | -1 | -1 | -1 | -1                 | [3,1] | 1  | -1 | -1 | -1 | [4,1] |
| 1  | 1  | 1  | 1  | [1,1] | 1                  | 1  | 1  | 1  | [2,2]              | 1  | 1  | 1  | 1                  | [3,1] | 1  | 1  | 1  | 1  | [4,1] |
| 0  | -1 | 0  | -1 | [2,2] | -1                 | 0  | -1 | 0  | [2,2]              | 0  | -1 | 0  | -1                 | [4,2] | -1 | 0  | -1 | 0  | [4,2] |
| 0  | 1  | 0  | 1  | [2,2] | 1                  | 0  | 1  | 0  | [2,2]              | 0  | 1  | 0  | 1                  | [4,2] | 1  | 0  | 1  | 0  | [4,2] |
| 1  | -1 | 1  | -1 | [2,2] | -1                 | 1  | -1 | 1  | [2,2]              | 1  | -1 | 1  | -1                 | [4,2] | -1 | 1  | -1 | 1  | [4,2] |

These sequences are indicated with the annotation of  $[p,j]$ .

Table S6. The number of classes of the first 15  $n$ -node-cycles

| $n$ | $N_n$  |
|-----|--------|
| 3   | 7      |
| 4   | 15     |
| 5   | 30     |
| 6   | 74     |
| 7   | 171    |
| 8   | 444    |
| 9   | 1138   |
| 10  | 3048   |
| 11  | 8175   |
| 12  | 22427  |
| 13  | 61686  |
| 14  | 171630 |
| 15  | 479411 |

**Table S7. Size of the networks analyzed in this study**

| Network        | Nodes | Number of links: directional + 2 ×<br>non/bidirectional |
|----------------|-------|---------------------------------------------------------|
| <i>E. coli</i> | 1,444 | 3,354                                                   |
| Yeast          | 4,084 | 9,997                                                   |
| Signaling      | 599   | 1,706                                                   |
| Neuronal       | 283   | 1,469                                                   |
| Foodweb        | 183   | 2,494                                                   |
| Brain          | 7,227 | 21,014                                                  |
| Electrical     | 5,844 | 8,199                                                   |
| FAA            | 1,226 | 2,615                                                   |
| Tracert        | 3,094 | 3,073                                                   |

For the total number of links, the symmetric links are counted twice (i.e., the  $ij$  and the  $ji$  directions are counted), even though for some of the networks some of these edges may represent nondirectional links.



**Table S8. Counts of self-loops and feedback loops between pairs of nodes**

| Network        | Self-loops | Two-node loops |
|----------------|------------|----------------|
| Yeast          | 0          | 5              |
| <i>E. coli</i> | 94         | 8              |
| Signaling      | 0          | 307            |
| Foodweb        | 18         | 42             |
| Neuronal       | 3          | 606            |
| Brain          | 0          | 10,036         |
| Electrical     | 0          | 0              |
| Tracert        | 11         | 1              |
| FAA            | 2          | 205            |

In the count for the total number of two-node loops, all the symmetric links are counted even though for some of the networks some of these edges may represent nondirectional links.

## Other Supporting Information Files

[Appendix \(PDF\)](#)
